# Supplementary material for: The Impact of Giving Feedback in Online Discussions
Source: Atypon-hosted journal article supplement (doi:10.1027/1864-1105/a000330), 2022-02-02
Supplement: 1864-1105_a000330_esm1.pdf [file 1864-1105_a000330_esm1.pdf]

<https://doi.org/10.1027/1864-1105/a000330>

### Electronic Supplementary Material

complementing the manuscript

#### The Impact of Giving Feedback in Online Discussions:

#### Effects of Evaluative Reply Comments on the Authors of Evaluated User Comments

Journal of Media Psychology

### Appendix

#### *Stimulus comments*

#### Reference of evaluation

| Valence of the evaluation | Reference of evaluation                                                 |                                                                                              |
|---------------------------|-------------------------------------------------------------------------|----------------------------------------------------------------------------------------------|
|                           | Directed at the content                                                 | Directed at the person                                                                       |
| <b>Disapproving</b>       | it really sucks that you write here ... get out, you don't fit in here! | it really sucks that this comment is written here ... get rid of it, it doesn't fit in here! |
| <b>Mixed</b>              | it's interesting that you write here ... let's see if you fit in here?  | it's interesting that this comment is written here ... let's see if it fits in here?         |
| <b>Approving</b>          | it's really cool that you write here ... keep it up, you fit in here!   | it's really cool that this comment is written here ... keep it up, that fits in here!        |

**Results of the Pretest****Table EI***Assessment of the stimulus reply comments regarding valence in the pretest*

| The reply<br>comment...                      | Valence of the evaluation of stimulus |                               |                                   |                                 |
|----------------------------------------------|---------------------------------------|-------------------------------|-----------------------------------|---------------------------------|
|                                              | <b>Disapproving</b><br><i>M (SD)</i>  | <b>Mixed</b><br><i>M (SD)</i> | <b>Approving</b><br><i>M (SD)</i> |                                 |
| opposes/agrees                               | 1.23 (0.81)                           | 3.77 (1.17)                   | 5.04 (1.29)                       | $F(2,94) = 206.757, p < .001^a$ |
| shows interest/<br>does not show<br>interest | 3.79 (1.32)                           | 2.15 (1.09)                   | 2.15 (1.17)                       | $F(2,94) = 42.443, p < .001^b$  |
| is positive/<br>is negative                  | 5.75 (0.81)                           | 2.85 (1.27)                   | 1.73 (1.33)                       | $F(2,94) = 198.992, p < .001^c$ |

Note.

All items measured on a semantic differential scale from 1 “strongly agree with item” to 6 “strongly agree with opposing item”.

$N = 48$ . Repeated measures ANOVAs

<sup>a</sup>Results of the post-hoc power analysis: Effect size  $f = 2.10$ ,  $\alpha = .05$ , average correlation among repeated measures  $r = .27$ , power  $> .999$ .

<sup>b</sup>Results of the post-hoc power analysis: Effect size  $f = 0.95$ ,  $\alpha = .05$ , average correlation among repeated measures  $r = .29$ , power  $> .999$ .

<sup>c</sup>Results of the post-hoc power analysis: Effect size  $f = 2.06$ ,  $\alpha = .05$ , average correlation among repeated measures  $r = .20$ , power  $> .999$ .

**Table EII**

*Assessment of the disapproving stimulus reply comments regarding reference of the evaluation in the pretest*

|                                                                             | Reference of the evaluation of stimulus |                        |                          |
|-----------------------------------------------------------------------------|-----------------------------------------|------------------------|--------------------------|
|                                                                             | Directed at the content                 | Directed at the person |                          |
| The reply comment...                                                        | <i>M (SD)</i>                           | <i>M (SD)</i>          |                          |
| addresses the content of the comment/<br>addresses the person of the author | 1.79 (1.14)                             | 4.71 (1.57)            | $t = -7.350, p < .001^a$ |
| refers to the comment content/<br>refers to the person of the author        | 5.25 (0.94)                             | 2.58 (1.67)            | $t = 6.822, p < .001^b$  |

Note.

All items measured on a semantic differential scale from 1 “strongly agree with item” to 6 “strongly agree with opposing item”.

$N = 48$ . Independent  $t$ -tests.

<sup>a</sup>Results of the post-hoc power analysis: Effect size  $d = 2.13$ ,  $\alpha = .05$ , sample sizes in each group  $n = 24$ , power  $> .999$ .

<sup>b</sup>Results of the post-hoc power analysis: Effect size  $d = 1.97$ ,  $\alpha = .05$ , sample sizes in each group  $n = 24$ , power = .999.

**Table EIII**

*Assessment of the mixed stimulus reply comments regarding reference of the evaluation in the pretest*

|                                                                             | Reference of the evaluation of stimulus |                        |                          |
|-----------------------------------------------------------------------------|-----------------------------------------|------------------------|--------------------------|
|                                                                             | Directed at the content                 | Directed at the person |                          |
| The reply comment...                                                        | <i>M (SD)</i>                           | <i>M (SD)</i>          |                          |
| addresses the content of the comment/<br>addresses the person of the author | 1.71 (1.30)                             | 3.67 (1.69)            | $t = -4.549, p < .001^a$ |
| refers to the comment content/<br>refers to the person of the author        | 4.88 (1.57)                             | 2.96 (1.83)            | $t = 3.896, p < .001^b$  |

Note.

All items measured on a semantic differential scale from 1 “strongly agree with item” to 6 “strongly agree with opposing item”.

$N = 48$ . Independent  $t$ -tests.

<sup>a</sup>Results of the post-hoc power analysis: Effect size  $d = 1.30$ ,  $\alpha = .05$ , sample sizes in each group  $n = 24$ , power = .997.

<sup>b</sup>Results of the post-hoc power analysis: Effect size  $d = 1.13$ ,  $\alpha = .05$ , sample sizes in each group  $n = 24$ , power = .986.

**Table EIV**

*Assessment of the approving stimulus reply comments regarding reference of the evaluation in the pretest*

|                                                                             | Reference of the evaluation of stimulus |                        |                          |
|-----------------------------------------------------------------------------|-----------------------------------------|------------------------|--------------------------|
|                                                                             | Directed at the content                 | Directed at the person |                          |
| The reply comment...                                                        | <i>M (SD)</i>                           | <i>M (SD)</i>          |                          |
| addresses the content of the comment/<br>addresses the person of the author | 1.88 (1.36)                             | 3.65 (1.82)            | $t = -3.786, p < .001^a$ |
| refers to the comment content/<br>refers to the person of the author        | 5.08 (1.50)                             | 2.78 (1.76)            | $t = 4.888, p < .001^b$  |

Note.

All items measured on a semantic differential scale from 1 “strongly agree with item” to 6 “strongly agree with opposing item”.

$N = 48$ . Independent  $t$ -tests.

<sup>a</sup>Results of the post-hoc power analysis: Effect size  $d = 1.10$ ,  $\alpha = .05$ , sample sizes in each group  $n = 24$ , power = .983.

<sup>b</sup>Results of the post-hoc power analysis: Effect size  $d = 1.41$ ,  $\alpha = .05$ , sample sizes in each group  $n = 24$ , power = .999.

**Table EV***Positive face threat by condition*

|                                 | <b>Reference of evaluation</b>     |                                   |                  |
|---------------------------------|------------------------------------|-----------------------------------|------------------|
|                                 | <b>Directed at the<br/>content</b> | <b>Directed at the<br/>person</b> | <b>Total</b>     |
|                                 | <i>(n = 183)</i>                   | <i>(n = 184)</i>                  | <i>(N = 367)</i> |
| <b>Valence of evaluation</b>    | <i>M (SD)</i>                      | <i>M (SD)</i>                     | <i>M (SD)</i>    |
| Disapproving ( <i>n = 115</i> ) | 5.77 (1.04)                        | 6.42 (0.60)                       | 6.11 (0.89)      |
| Mixed ( <i>n = 109</i> )        | 3.69 (1.31)                        | 4.60 (1.41)                       | 4.14 (1.43)      |
| Approving ( <i>n = 143</i> )    | 1.98 (1.13)                        | 2.34 (1.13)                       | 2.15 (1.14)      |
| Total ( <i>N = 367</i> )        | 3.61 (1.95)                        | 4.36 (2.03)                       | 3.98 (2.03)      |

**Table EVI***Negative face threat by condition*

|                                 | <b>Reference of evaluation</b>     |                                   |                  |
|---------------------------------|------------------------------------|-----------------------------------|------------------|
|                                 | <b>Directed at the<br/>content</b> | <b>Directed at the<br/>person</b> | <b>Total</b>     |
|                                 | <i>(n = 183)</i>                   | <i>(n = 184)</i>                  | <i>(N = 367)</i> |
| <b>Valence of evaluation</b>    | <i>M (SD)</i>                      | <i>M (SD)</i>                     | <i>M (SD)</i>    |
| Disapproving ( <i>n = 115</i> ) | 3.14 (1.64)                        | 3.45 (1.72)                       | 3.31 (1.68)      |
| Mixed ( <i>n = 109</i> )        | 2.30 (1.26)                        | 2.59 (1.42)                       | 2.45 (1.34)      |
| Approving ( <i>n = 143</i> )    | 1.144 (0.81)                       | 1.56 (0.78)                       | 1.49 (0.79)      |
| Total ( <i>N = 367</i> )        | 2.20 (1.42)                        | 2.49 (1.56)                       | 2.34 (1.49)      |

**Table EVII***Negative emotions by condition*

|                                | Reference of evaluation                         |                                                |                            |
|--------------------------------|-------------------------------------------------|------------------------------------------------|----------------------------|
|                                | Directed at the<br>content<br>( <i>n</i> = 183) | Directed at the<br>person<br>( <i>n</i> = 184) | Total<br>( <i>N</i> = 367) |
| Valence of evaluation          | <i>M</i> ( <i>SD</i> )                          | <i>M</i> ( <i>SD</i> )                         | <i>M</i> ( <i>SD</i> )     |
| Disapproving ( <i>n</i> = 115) | 1.53 (0.56)                                     | 1.70 (0.83)                                    | 1.62 (0.72)                |
| Mixed ( <i>n</i> = 109)        | 1.42 (0.54)                                     | 1.38 (0.63)                                    | 1.40 (0.58)                |
| Approving ( <i>n</i> = 143)    | 1.26 (0.47)                                     | 1.37 (0.63)                                    | 1.31 (0.55)                |
| Total ( <i>N</i> = 367)        | 1.39 (0.53)                                     | 1.48 (0.72)                                    | 1.44 (0.63)                |

**Table EVIII***Positive emotions by condition*

|                                | Reference of evaluation                         |                                                |                            |
|--------------------------------|-------------------------------------------------|------------------------------------------------|----------------------------|
|                                | Directed at<br>the content<br>( <i>n</i> = 183) | Directed at<br>the person<br>( <i>n</i> = 184) | Total<br>( <i>N</i> = 367) |
| Valence of evaluation          | <i>M</i> ( <i>SD</i> )                          | <i>M</i> ( <i>SD</i> )                         | <i>M</i> ( <i>SD</i> )     |
| Disapproving ( <i>n</i> = 115) | 2.46 (0.72)                                     | 2.56 (0.68)                                    | 2.51 (0.69)                |
| Mixed ( <i>n</i> = 109)        | 2.77 (0.93)                                     | 2.59 (0.73)                                    | 2.68 (0.84)                |
| Approving ( <i>n</i> = 143)    | 2.71 (0.77)                                     | 2.88 (0.74)                                    | 2.79 (0.76)                |
| Total ( <i>N</i> = 367)        | 2.65 (0.81)                                     | 2.69 (0.73)                                    | 2.67 (0.77)                |

**Table EIX***Willingness to participate further by condition*

|                                | <b>Reference of evaluation</b>                          |                                                        |                                   |
|--------------------------------|---------------------------------------------------------|--------------------------------------------------------|-----------------------------------|
|                                | <b>Directed at<br/>the content</b><br>( <i>n</i> = 183) | <b>Directed at the<br/>person</b><br>( <i>n</i> = 184) | <b>Total</b><br>( <i>N</i> = 367) |
| <b>Valence of evaluation</b>   | <i>M (SD)</i>                                           | <i>M (SD)</i>                                          | <i>M (SD)</i>                     |
| Disapproving ( <i>n</i> = 115) | 3.35 (1.33)                                             | 3.22 (1.35)                                            | 3.28 (1.33)                       |
| Mixed ( <i>n</i> = 109)        | 3.48 (1.32)                                             | 3.75 (1.57)                                            | 3.61 (1.45)                       |
| Approving ( <i>n</i> = 143)    | 3.77 (1.57)                                             | 3.99 (1.40)                                            | 3.88 (1.49)                       |
| Total ( <i>N</i> = 367)        | 3.56 (1.43)                                             | 3.66 (1.46)                                            | 3.61 (1.45)                       |
